# Supplementary material for: An integrated approach for preventing hydrogen leakage from metallic vessels: barrier and scavenging
Source: Royal Society of Chemistry journal article supplement (doi:10.1039/d3ta03255h), 2023-01-01
Supplement: d3ta03255h1.pdf [file d3ta03255h1.pdf]

## Integrated approach for preventing hydrogen leakage from metallic vessels: barrier and scavenging

### SUPPORTING INFORMATION

Yonatan Luzzatto, <sup>†a</sup> Amer Alatawna, <sup>†a</sup> Eli Peretz, <sup>b</sup> Orit Mendelson, <sup>b</sup> Svetlana Pevzner, <sup>b</sup> and Oren Regev<sup>c</sup>

The rate of 1,4-bis(phenylethynyl)benzene (PEB) hydrogenation is:

$$\frac{d[PEB]}{dt} = k(T)[PEB]^x[H_2]^y \quad (S1)$$

Where [PEB] is unsaturated concentration,  $x$  and  $y$  are the reaction orders, and  $k(T)$  is the temperature-dependent reaction constant. At a constant temperature and hydrogen pressure:

$$k_{obs} = k[H_2]^y \quad (S2)$$

Since the hydrogen pressure is constant during the experiment, and assuming a first-order reaction ( $x=1$ , approved experimentally, see Fig. S1), eqn S2 yields:

$$\ln[PEB] = \ln[PEB]_0 - k_{obs}t \quad (S3)$$

According to eqn S3,  $\ln[PEB]$  shows a linear behavior with time, where the slope in the equation is the reaction constant ( $k_{obs}$ ).

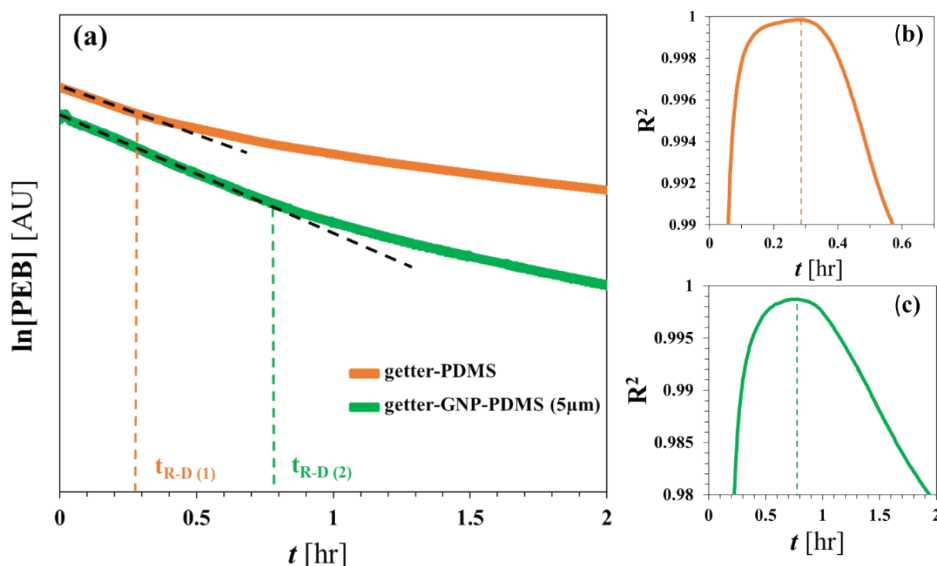

**Fig. S1** (a) Reaction curves of getter-PDMS (orange) and getter-GNP-PDMS (green, 5  $\mu$ m, 1 wt%). Dashed lines is a guide for the eye. The determination of  $t_{R-D}$  was determined by following the change in the curve of  $R^2$  vs.  $t$ .  $t_{R-D}$  is the time at which the maximum  $R^2$  is obtained, as shown for the getter-PDMS (b) and getter-GNP-PDMS systems (c).

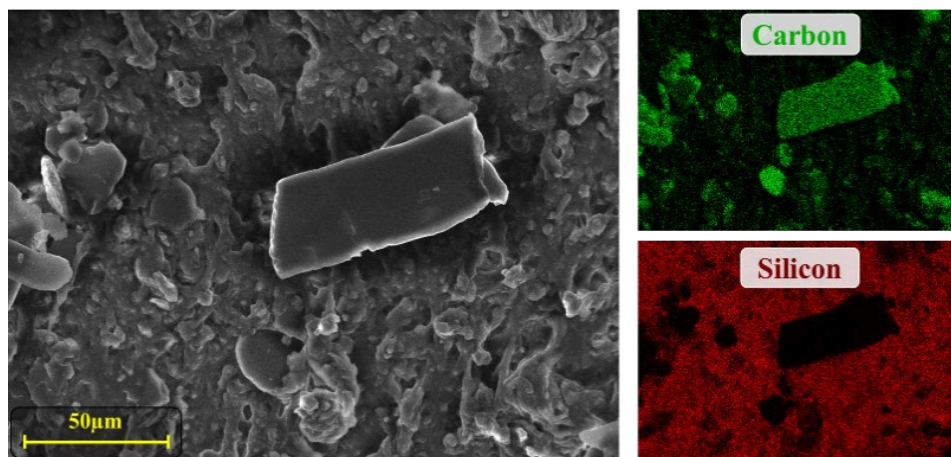

**Fig. S2** EDS mapping of aggerates formed after hydrogenation at 296 K in a getter-PDMS system. A large aggregate was chosen (much above the average size) to simplify the analysis.

---

| Element   | Percentage |
|-----------|------------|
| Carbon    | 81.7       |
| Silicone  | 18.0       |
| Palladium | 0.1        |
| Other     | 0.2        |

**Table S1.** Elemental analysis of the aggerates based on EDS (see Fig. S2).

---

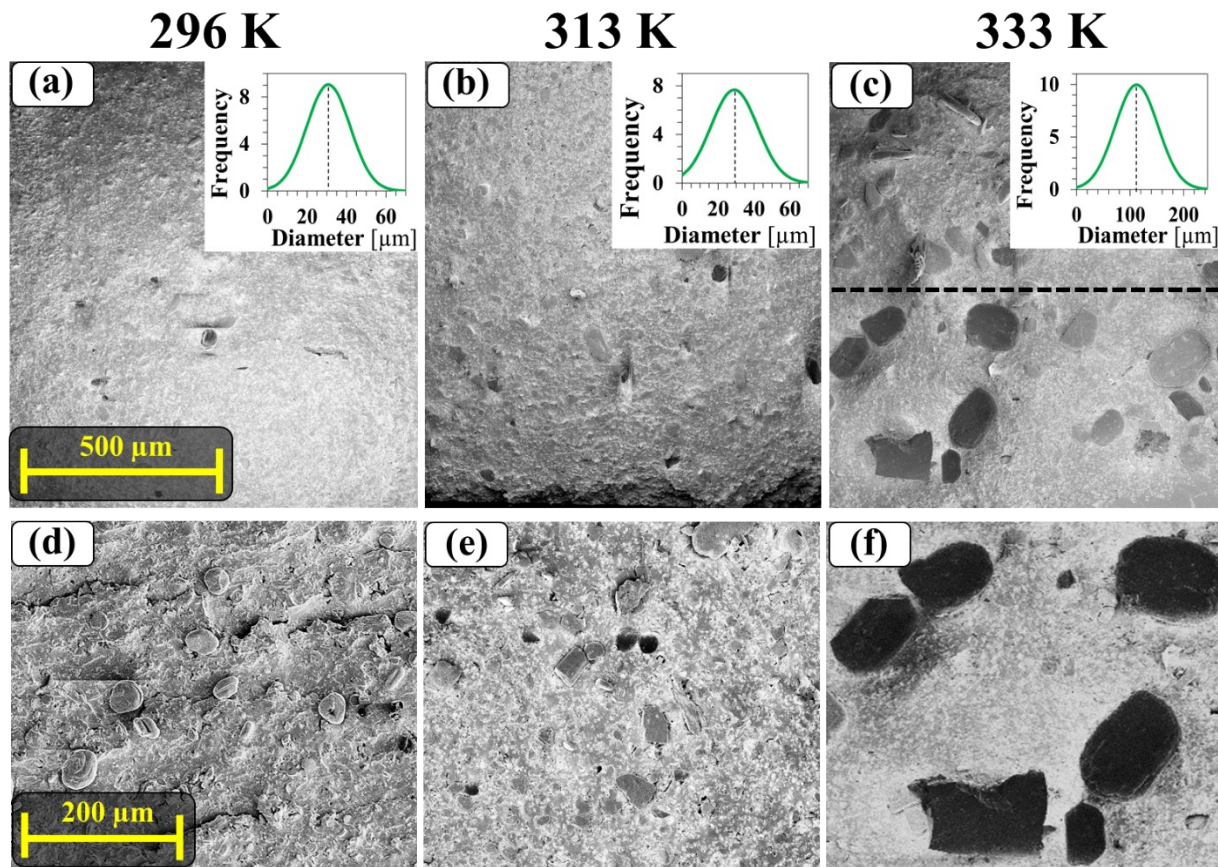

**Fig. S3** A SEM micrograph of cross-sections in the **getter-GNP-PDMS** (5 μm GNP) system after hydrogenation at (a) 296 K, (b) 313 K: the aggregates were rather small ( $31 \pm 11$  μm and  $29 \pm 13$  in size,  $n=50$ ) and uniformly dispersed. (c) At 333 K, larger aggregates ( $112 \pm 40$  μm in size,  $n=50$ ) were found at the bottom of the sample, most probably due to PEB liquefaction followed by precipitation (delineated by a dashed line. Insets: size distributions of the aggregates. (d-f) higher magnification of the aggregates after hydrogenation at (d) 296 K, (e) 313 K, and (f) 333 K. In figures (a-c), the scalebar is 500 μm, and in (d-f), it is 200 μm.

**getter-PDMS**

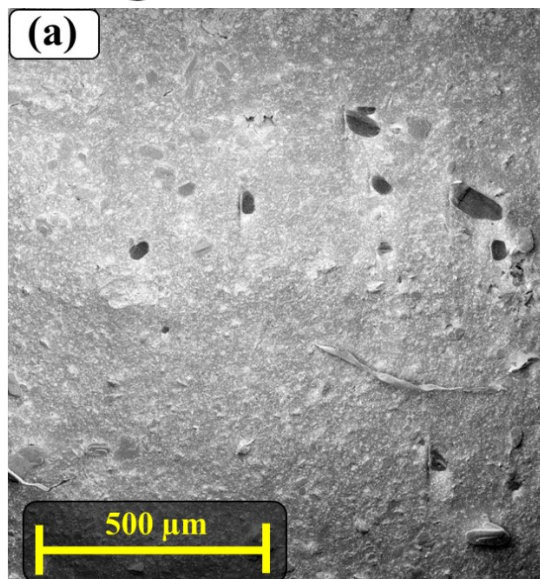

**getter-GNP-PDMS**

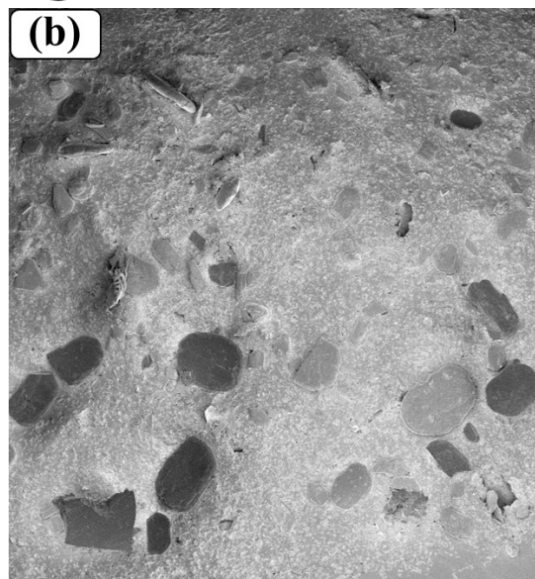

**Fig. S4** Cross-sections of (a) getter-PDMS and (b) getter-GNP-PDMS system after hydrogenation at 333 K. The scale bar refers to both (a) and (b).

---

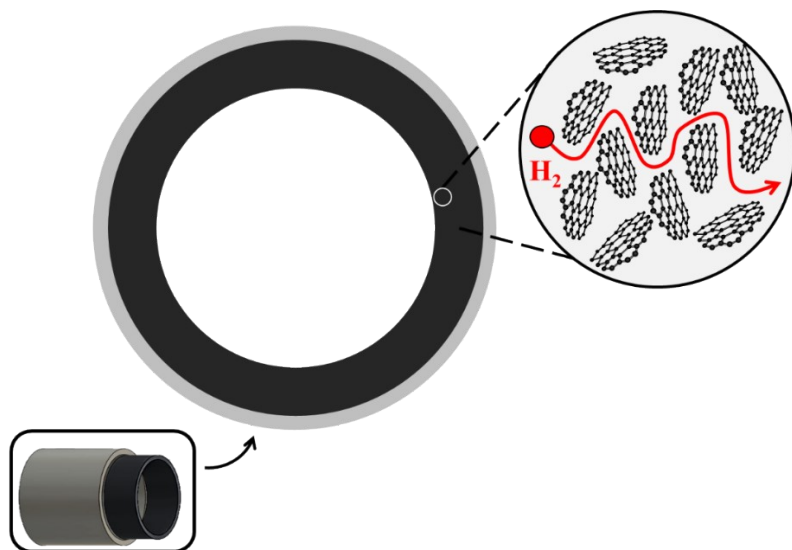

**Fig. S5** A composite-based coating (polymer-GNP) created a tortuous path, decreasing hydrogen diffusion and, consequently, the composite permeability.

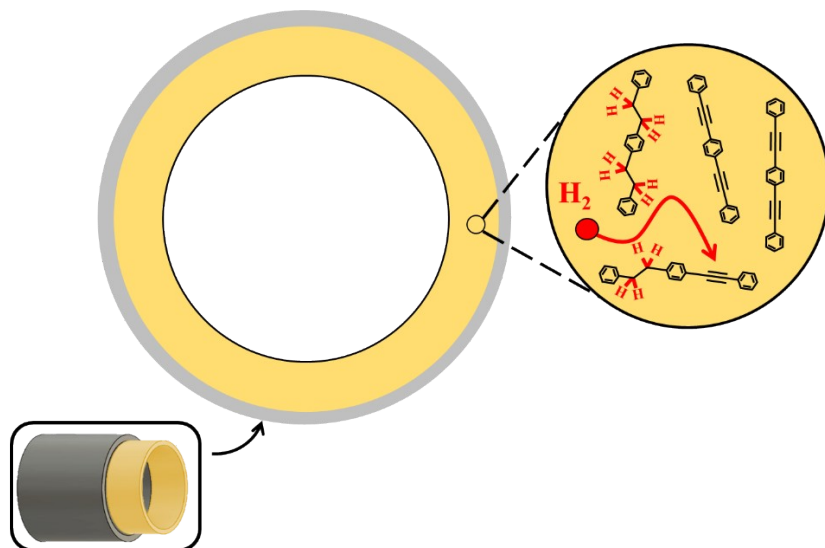

**Fig. S6** A composite-based coating (polymer-PEB) that absorbed hydrogen, where unreacted and partially and fully hydrogenated PEB are shown. The red arrow symbols the reaction between hydrogen and the triple bond of a PEB molecule.

<sup>a</sup> Department of Chemical Engineering, Ben-Gurion University of the Negev, Beer-Sheva, 8410500 Israel.

<sup>b</sup> Department of Chemistry, Nuclear Research Centre-Negev, Beer-Sheva, 84190 Israel.

<sup>c</sup> Department of Chemical Engineering Negev and Ilse Katz Institute for Nanoscale Science and Technology, Ben-Gurion University of the Negev, Beer-Sheva, 8410500 Israel.

† These authors were equally contributed to this article
